# Supplementary material
Source: PubMed Central journal article supplement (PMC3352976)

Supplementary figure 1.

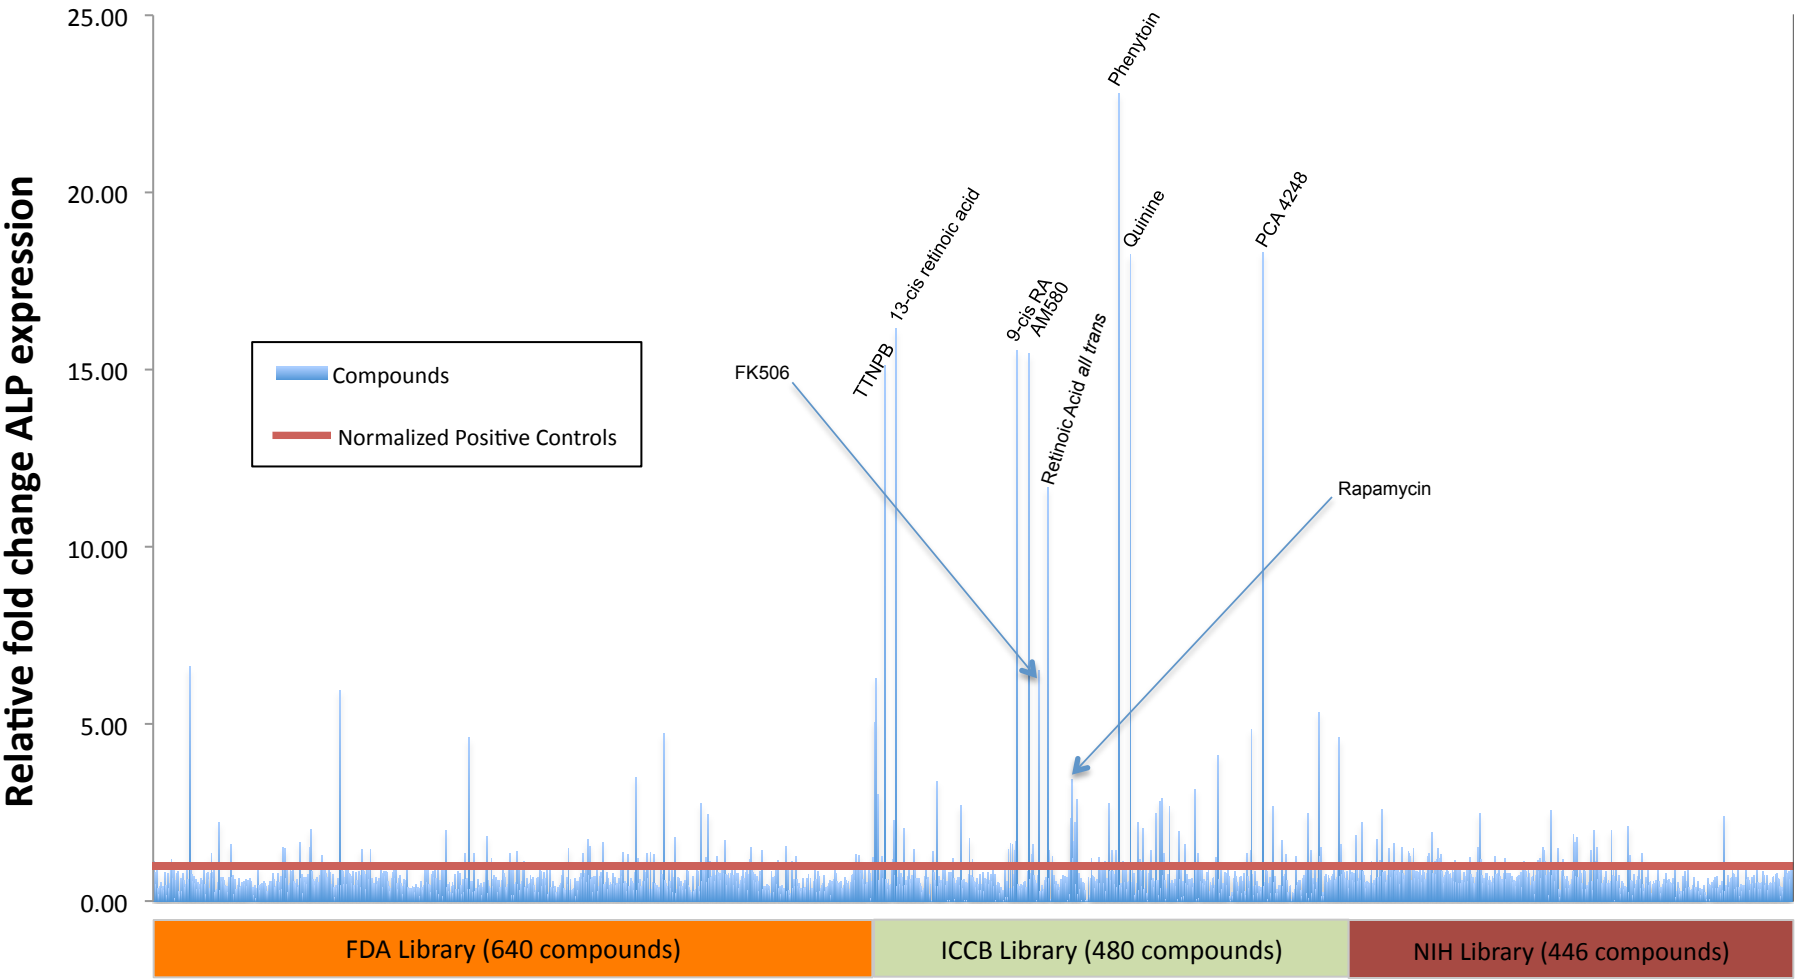

Supplement: NIHMS368149-supplement-01.pdf [file NIHMS368149-supplement-01.pdf]
